# Supplementary material
Source: PubMed Central journal article supplement (PMC6230322)
Supplement: NIHMS1504209-supplement-1.pdf [file NIHMS1504209-supplement-1.pdf]

|               | IFN <sub>P/R</sub> | IFN <sub>R</sub> | IFN <sub>P</sub> | P value           | Forward Primer                 | Reverse Primer               |
|---------------|--------------------|------------------|------------------|-------------------|--------------------------------|------------------------------|
| <i>TLR3</i>   | 0.1412             | -0.2189          | 0.1228           | <b>0.0131</b>     | ACCACCAGCAATACAACCT            | GAATCGTTACCAACCACATT         |
| <i>CCND1</i>  | 0.3391             | -0.1493          | 0.0662           | <b>0.0235</b>     | CACTTCCTCTCCAAAATG             | TGGAAATGAACTTCACAT           |
| <i>CD24</i>   | 0.3687             | -0.1595          | -0.2029          | <b>0.0008</b>     | TAAGAGACTCAGGCCAAGA            | AATTAGTAGATTGGATGAAGACCT     |
| <i>IFNA21</i> | 0.0418             | -0.0478          | -0.0694          | 0.8297            | CTACTTGGGAACAGAGCCTC           | TCCACATTCATCAGGGG            |
| <i>TLR7</i>   | 0.3439             | -0.1888          | -0.0925          | <b>0.0026</b>     | CAGAACTATATCTCTACAACAACA       | GAGGGCAATTTCCACTTAG          |
| <i>IFIT1</i>  | 0.4240             | -0.0613          | -0.1664          | <b>0.0073</b>     | ACAGCAACCATGAGTACAA            | CAATGGATAACTCCCATGTAAAG      |
| <i>IFNA14</i> | 0.0363             | -0.2431          | 0.2642           | <b>0.0025</b>     | GTGGTGTCTCAGCTGCAAGTC          | GGCTGTGGGTTTGAGACAGATT       |
| <i>IFNB</i>   | 0.1931             | -0.2734          | 0.1935           | <b>0.0012</b>     | GTCTCCTCCAAATTGCTCTC           | ACAGGAGCTTCTGACACTGA         |
| <i>IFNA7</i>  | 0.2548             | -0.3836          | 0.2586           | <b>&lt;0.0001</b> | GCCCGGTCTTTTCTTACTG            | TTCATGTCTGTCTTCAAGC          |
| <i>IFNA16</i> | -0.1909            | -0.3500          | 0.5277           | <b>&lt;0.0001</b> | TATGATTCGGATTCCCCCAGGAGGTG     | GTCTCATCCCAAGCAGCAGATGAATC   |
| <i>IFNA10</i> | -0.3317            | -0.3818          | 0.6471           | <b>&lt;0.0001</b> | TAGGAGGGCCTTGATACTCTGGG        | TGCCATCAAACCTCCTCTGGGGGAT    |
| <i>IFNA17</i> | -0.1350            | -0.4362          | 0.6083           | <b>&lt;0.0001</b> | CCGTGTGGTGTCTCAGCTA            | TGTGGGTCTGAGGCAGATCA         |
| <i>IFNA4</i>  | -0.2855            | -0.4049          | 0.6811           | <b>&lt;0.0001</b> | ACTCCTGGCACAAATGGGAAGAATCTCTCA | GAGCCTTCTGGAAGTGGTGGCCA      |
| <i>IFNA2</i>  | -0.1058            | -0.1516          | 0.1605           | 0.0975            | CTTGAAGGACAGACATGACTTTGGA      | GGATGGTTTCAGCCTTTTGGGA       |
| <i>IFNA1</i>  | 0.1589             | -0.2682          | 0.1449           | <b>0.0020</b>     | CTTCAACCTCTTTACCACAAAAGATTG    | TGCTGGTAGAGTTCCGGTGCA        |
| <i>IFNA8</i>  | 0.1362             | -0.2620          | 0.2347           | <b>0.0008</b>     | CCTTCTAGATGAATTCTACATCGAACTTG  | ACTCTATACCCCCACTTCTCTG       |
| <i>IFNA5</i>  | -0.2513            | -0.1990          | 0.3234           | <b>0.0002</b>     | CCCTGGTGGTGTCTCAACTG           | CTTCCCATTTGTGCCATTATC        |
| <i>IFNA6</i>  | -0.3010            | 0.0025           | 0.0254           | 0.1212            | TCCATGAGGTGATTGAGCAGAC         | GCTGCTGGTAAAGTTCAGTATAGAGTTT |
| <i>IFIT2</i>  | -0.2386            | 0.3315           | -0.3557          | <b>&lt;0.0001</b> | GATACGCAGGTAGAGAGGAA           | TGTAACGTTGAACCAGTTGT         |
| <i>IRF7</i>   | 0.5169             | -0.1419          | -0.2711          | <b>&lt;0.0001</b> | TCTGGTGAAGCTGGAA               | CATAAGGAAGCACTCGATGTC        |
| <i>ZBP1</i>   | 0.6254             | -0.1405          | -0.2691          | <b>&lt;0.0001</b> | CCAACAACGGGAGGAAG              | TTTGTCTCTCATTCCC             |
| <i>MX1</i>    | -0.0943            | 0.1510           | -0.3301          | <b>0.0018</b>     | CCCACTGCGAGGAGATC              | GTAAGCTCTAATATACGTTCTTC      |
| <i>PKR</i>    | -0.0152            | 0.1101           | -0.2613          | <b>0.0474</b>     | CTCCACATGATAGGAGGTTTAC         | TGCTTCCTTCTTTGATCTACC        |
| <i>IRF9</i>   | 0.1803             | 0.0492           | -0.3078          | <b>0.0158</b>     | CTCCAGGACTCCCTCAATAA           | CCTCAGTTGTGTCTGTAACCTC       |
| <i>TLR9</i>   | -0.1480            | 0.1240           | -0.1546          | 0.1174            | TGAGCTACAACAACATCAT            | CAGAGTCTAGCATCAGGA           |
| <i>CCND2</i>  | -0.2741            | 0.1984           | -0.1981          | <b>0.0050</b>     | GACGTGGATTGTCTCAA              | GTTTCATCCTCCGACTTGG          |
| <i>CD69</i>   | 0.0645             | 0.0276           | -0.2690          | 0.0614            | GATACGCAGGTAGAGAGGAA           | TGTAACGTTGACCAGTTGT          |
| <i>BAFFR</i>  | 0.0779             | 0.0114           | -0.1345          | 0.5039            | CCTCACCATCTTTGACAG             | AAGCGGTCTTTTACTCAT           |
| <i>IFNAR1</i> | -0.1240            | 0.2065           | -0.2415          | <b>0.0061</b>     | TCAGGTGTAGAAGAAAGGATTG         | CCATGACGTAAGTAGTGCTG         |
| <i>IFNAR2</i> | -0.0904            | 0.1149           | -0.1176          | 0.2799            | TCACCGTCTTAGAAGGATTTCAG        | TCACCGTCTTAGAAGGATTTCAG      |
| <i>IRF3</i>   | 0.2405             | -0.0477          | -0.1245          | 0.1583            | TTCTGATACCCAGGAAGACA           | GTGGGATTGTCCAAGCTG           |
| <i>RIG1</i>   | -0.0004            | 0.2644           | -0.3873          | <b>0.0002</b>     | TGTTTAGGGAGGAAGAGG             | CTCCAACAGGAACCTTGAGAAA       |

**Supplemental Table 1. Genes differentially expressed in IFN<sub>P/R</sub> vs IFN<sub>R</sub> vs IFN<sub>P</sub> transitional B cell clusters derived from 3 SLE patients.**

BioMark qRT-PCR analysis was used to determine the expression of the indicated gene in Fluidigm single captured transitional B cells (CD24<sup>+</sup>CD38<sup>+</sup>IgD<sup>+</sup>CD27<sup>-</sup>) derived from each patient. Data are mean of gene expression after normalization using the Clustvis analysis. Gene cluster analysis (shown on the left) was carried out using the Clustvis online software. The order of genes shown is based on the cluster analysis as shown in Fig. 1. Significant differences among means were analyzed using a one way ANOVA test with p value shown. Significantly differentially expressed genes are red color coded (p<0.05). All primers used are shown in the right.

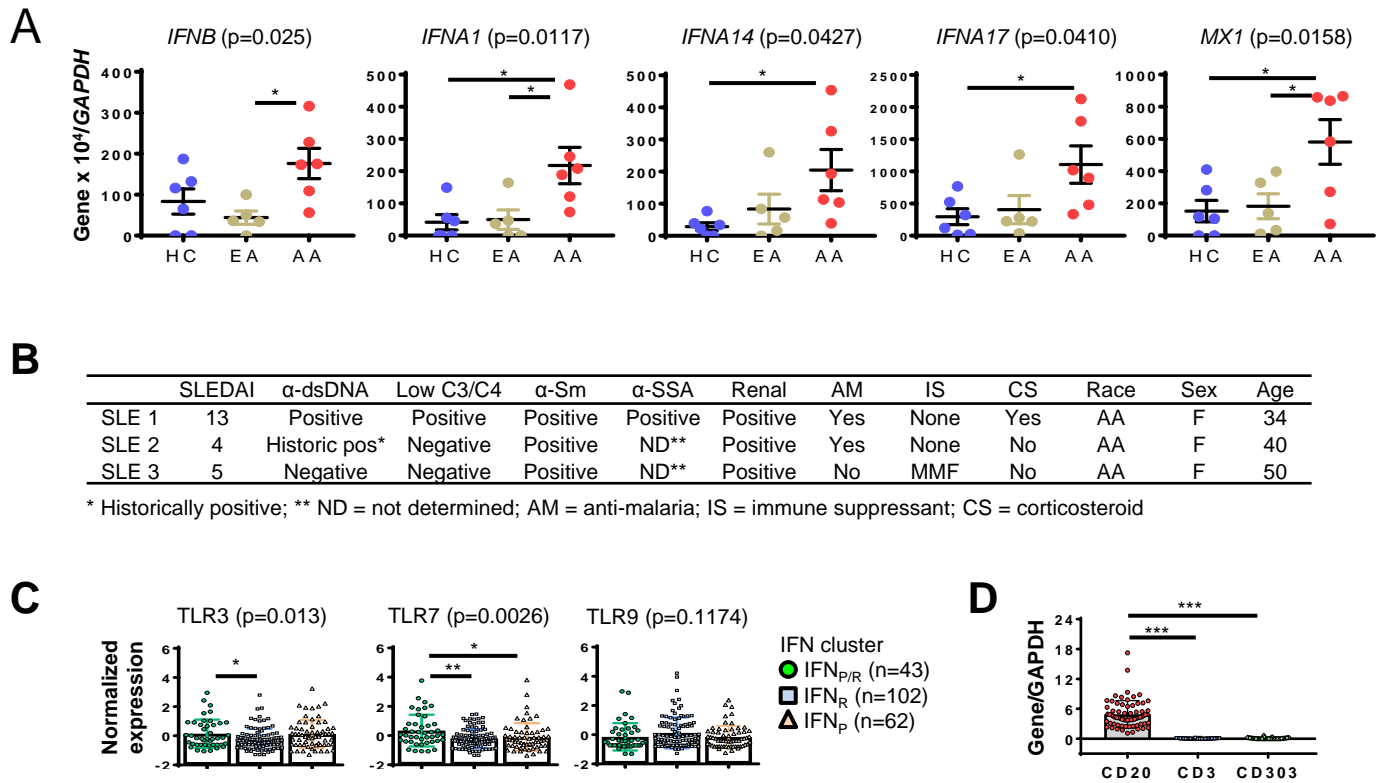

### Supplemental Fig. 1. Type I IFN associated genes in SLE transitional B cells.

**(A)** qRT-PCR gene expression of the indicated gene in bulk transitional B cells ( $CD24^+CD38^+IgD^+CD27^-$ ) from the PBMCs of healthy controls (HC), European American (EA) SLE patients, and African American (AA) SLE patients. Results are the expression of each gene after normalization with the expression of *GAPDH* (mean $\pm$ s.e.m,  $n=6$  for HC, 5 for EA SLE, and 6 for AA, SLE). **(B)** Clinical data of SLE patients whose PBMC Tr B cells were subjected for the Fluidigm/BioMark gene expression analysis shown in Figure 1. **(C)** Normalized expression values of the indicated TLR genes in  $IFN_{P/R}$  vs.  $IFN_R$  vs  $IFN_P$  transitional B cell clusters derived from 3 SLE patients. Significant differences among means were analyzed using a one way ANOVA test with p value shown on the top of each graph. **(D)** Expression of the indicated genes in single Tr B cells in SLE Patient #3 (mean $\pm$ s.d.; Differences between groups were analyzed using Tukey's multiple comparisons test ( $n=69$  single Tr B cells). Significant differences among means (A, C, and D) were analyzed using a one way ANOVA test with p value shown on the top of each graph. Differences between groups were analyzed using Tukey's multiple comparisons test (\*  $p<0.05$ , \*\*  $p<0.01$  or \*\*\*  $p<0.005$  between the indicated comparisons).

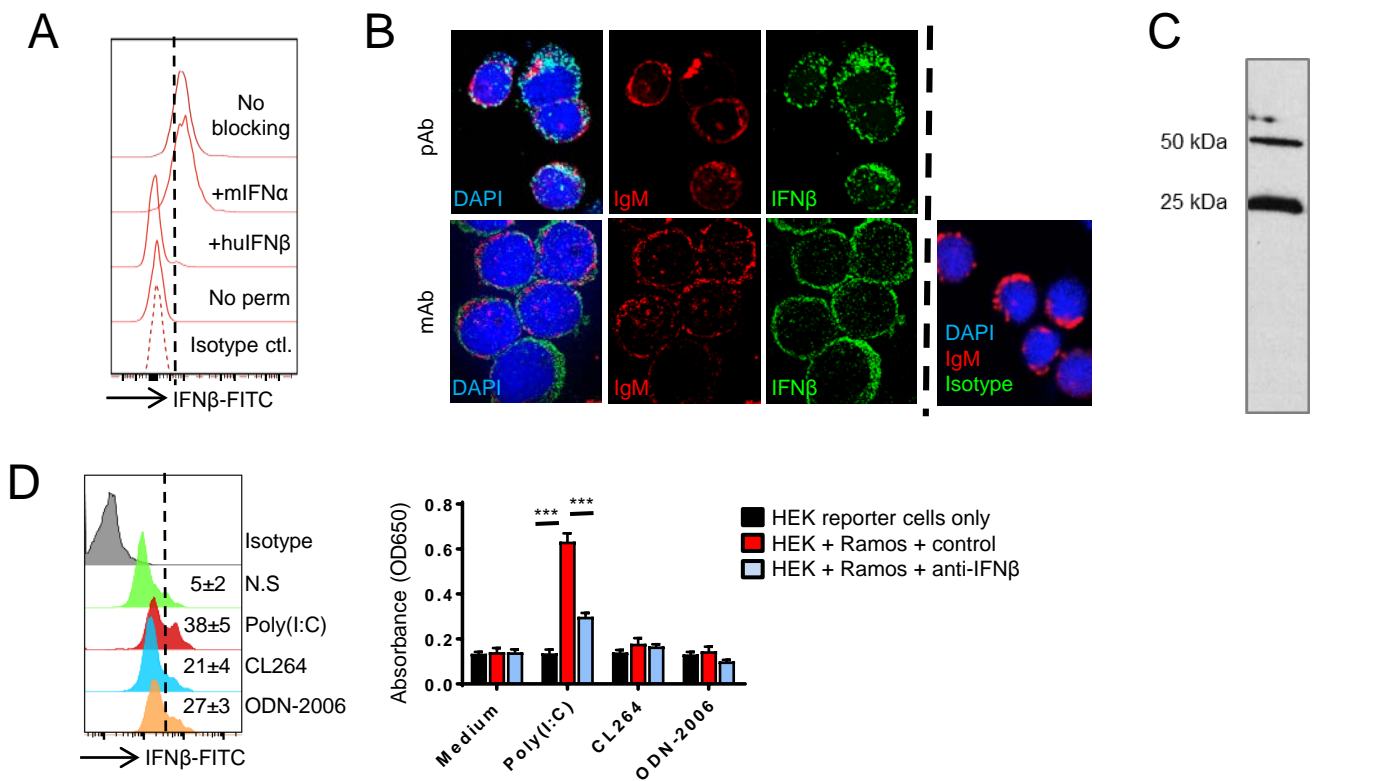

### Supplemental Fig. 2. Detection of intracellular IFN $\beta$ and its secretion by B cells.

**(A)** Histograms showing mode normalized counts of IFN $\beta$  staining in total CD19<sup>+</sup> B cells from a representative SLE patient. Anti-IFN $\beta$  antibody was pre-incubated with either human IFN $\beta$  or mouse IFN $\alpha$  prior to FACS staining. In the bottom two histogram tracks, cells were either left unpermeabilized prior to anti-IFN $\beta$  antibody incubation (No-perm) or stained with an isotype control antibody (Isotype ctl.).

**(B)** Super-resolution microscopy imaging (objective lens: 100x) of IFN $\beta$  in purified SLE B cells comparing two commercial Abs (*Top*: rabbit polyclonal Ab from Abcam; *Bottom*; mouse monoclonal FITC-conjugated Ab from PBL) with IgG1-k isotype control shown (right).

**(C)** Immunoblot analysis of IFN $\beta$  in cytoplasmic lysates prepared from freshly isolated SLE B cells.

**(D)** Left: Representative FACS plots showing the frequency of IFN $\beta$ <sup>+</sup> Ramos B cells 8 hrs following stimulation with the indicated agonistic TLR ligand (5  $\mu$ g/mL each); Right: HEK-blue reporter analysis of type I IFN secretion by Ramos cells under the indicated conditions of stimulation (5  $\mu$ g/mL) or blocking antibody treatment (unspecific rabbit IgG or a polyclonal rabbit anti-human IFN $\beta$ , 10  $\mu$ g/mL each) 24 hrs post stimulation; (mean $\pm$ s.e.m.; n=3, p<0.005 between the indicated comparison, Tukey's multiple comparisons test).
